# Supplementary material for: Impact of Sodium Hypochlorite Applied as Nutrient Solution Disinfectant on Growth, Nutritional Status, Yield, and Consumer Safety of Tomato (Solanum lycopersicum L.) Fruit Produced in a Soilless Cultivation
Source: MDPI journal article supplement (doi:10.3390/horticulturae9030352), 2023-03-07
Supplement: s1 [file s1]

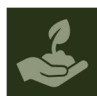

**Table S2.** Details about the three disinfection applications using sodium hypochlorite in the nutrient solution supplied to a tomato cultivated in an open soilless system.

| Date      | Days after transplanting | Application code | Comments                        | Days after first application (DAFA) |
|-----------|--------------------------|------------------|---------------------------------|-------------------------------------|
| 11-6-2019 | 32                       | A                | 26 days after fruit setting     | 0                                   |
| 26-6-2019 | 47                       | B                | 15 days after first application | 15                                  |
| 10-7-2019 | 61                       | C                | 2 days before harvest           | 29                                  |
