# Supplementary material for: Impact of Sodium Hypochlorite Applied as Nutrient Solution Disinfectant on Growth, Nutritional Status, Yield, and Consumer Safety of Tomato (Solanum lycopersicum L.) Fruit Produced in a Soilless Cultivation
Source: MDPI journal article supplement (doi:10.3390/horticulturae9030352), 2023-03-07
Supplement: s1 [file s1]

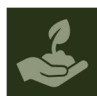

**Table S3.** Precursor ion, product ion, Capillary Voltage (CV) and Collision Energy (CE) for the chlorates and perchlorates analytes examined with LC/MS/MS for the determination of their residues in tomato fruits and nutrient solution samples of an open soilless system cultivation.

| Analyte                        | Precursor ion | Product ion | CV (V) | CE (eV) |
|--------------------------------|---------------|-------------|--------|---------|
| Chlorates                      | 83            | 67          | 72     | 20      |
| Chlorates                      | 85            | 69          | 88     | 20      |
| Chlorates $^{13}\text{O}_3$    | 89            | 71          | 40     | 11      |
| Perchlorates                   | 99            | 83          | 73     | 23.5    |
| Perchlorates                   | 101           | 85          | 56     | 24.5    |
| Perchlorates $^{18}\text{O}_4$ | 107           | 89          | 21     | 24      |
