# Supplementary material for: Impact of Sodium Hypochlorite Applied as Nutrient Solution Disinfectant on Growth, Nutritional Status, Yield, and Consumer Safety of Tomato (Solanum lycopersicum L.) Fruit Produced in a Soilless Cultivation
Source: MDPI journal article supplement (doi:10.3390/horticulturae9030352), 2023-03-07
Supplement: s1 [file s1]

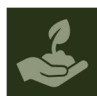**Table S1.** Recipes of nutrient solutions used in tomato cultivated in an open soilless system.

| Parameters                                                          | Saturation | Vegetative stage | Fruiting stage | Corrective recipe | Fruiting stage after corrective recipe | Fruiting stage |
|---------------------------------------------------------------------|------------|------------------|----------------|-------------------|----------------------------------------|----------------|
|                                                                     | 9-5-2019   | 10-5-2019        | 25-6-2019      | 4-7-2019          | 10-7-2019                              | 17-7-2019      |
| EC dS m <sup>-1</sup>                                               | 2.90       | 2.60             | 2.50           | 1.60              | 2.50                                   | 2.30           |
| K <sup>+</sup> (mmol L <sup>-1</sup> )                              | 6.80       | 7.00             | 6.80           | 3.20              | 7.15                                   | 6.00           |
| Ca <sup>2+</sup> (mmol L <sup>-1</sup> )                            | 6.40       | 5.10             | 4.90           | 3.50              | 4.80                                   | 4.50           |
| Mg <sup>2+</sup> (mmol L <sup>-1</sup> )                            | 3.00       | 2.40             | 2.40           | 1.40              | 2.50                                   | 2.30           |
| NO <sub>3</sub> <sup>-</sup> (mmol L <sup>-1</sup> )                | 15.50      | 14.30            | 14.30          | 9.00              | 13.75                                  | 13.75          |
| NH <sub>4</sub> <sup>+</sup> (mmol L <sup>-1</sup> )                | 1.10       | 1.40             | 1.10           | 0.65              | 0.78                                   | 0.90           |
| H <sub>2</sub> PO <sub>4</sub> <sup>-</sup> (mmol L <sup>-1</sup> ) | 1.40       | 1.50             | 1.50           | 1.20              | 1.40                                   | 1.40           |
| Fe (μmol L <sup>-1</sup> )                                          | 20.00      | 15.00            | 15.00          | 14.00             | 15.00                                  | 15.00          |
| Mn (μmol L <sup>-1</sup> )                                          | 12.00      | 10.00            | 10.00          | 8.00              | 10.00                                  | 10.00          |
| Zn (μmol L <sup>-1</sup> )                                          | 6.00       | 5.00             | 5.00           | 5.00              | 5.00                                   | 5.00           |
| Cu (μmol L <sup>-1</sup> )                                          | 0.80       | 0.80             | 0.80           | 0.60              | 0.80                                   | 0.80           |
| B (μmol L <sup>-1</sup> )                                           | 40.00      | 35.00            | 35.00          | 20.00             | 30.00                                  | 30.00          |
| Mo (μmol L <sup>-1</sup> )                                          | 0.50       | 0.50             | 0.50           | 0.50              | 0.50                                   | 0.50           |
| Cl <sup>-</sup> (mmol L <sup>-1</sup> )                             | 0.30       | 0.30             | 0.30           | 0.30              | 0.30                                   | 0.30           |
